# Supplementary material
Source: PubMed Central journal article supplement (PMC2830579)
Supplement: kxp059_1.pdf [file kxp059_1.pdf]

**Supplementary material to Frozen Robust Multi-array Analysis (fRMA)**  
**Matthew N. McCall, Benjamin M. Bolstad, Rafael A. Irizarry.**

Table 1: GEO accession numbers for the 850 samples used to generate the frozen parameters used by fRMA.

|           |           |           |           |           |
|-----------|-----------|-----------|-----------|-----------|
| GSM20894  | GSM20961  | GSM20943  | GSM20836  | GSM20817  |
| GSM19171  | GSM19149  | GSM19172  | GSM19136  | GSM19170  |
| GSM21635  | GSM21629  | GSM21638  | GSM21637  | GSM21632  |
| GSM22059  | GSM22057  | GSM22060  | GSM22062  | GSM22071  |
| GSM23119  | GSM23120  | GSM23118  | GSM23121  | GSM23117  |
| GSM23382  | GSM23372  | GSM23373  | GSM23384  | GSM23377  |
| GSM22069  | GSM24495  | GSM24493  | GSM22070  | GSM24494  |
| GSM107156 | GSM107226 | GSM107195 | GSM107114 | GSM107173 |
| GSM26287  | GSM26293  | GSM26291  | GSM26289  | GSM26288  |
| GSM26897  | GSM26878  | GSM26910  | GSM26888  | GSM26884  |
| GSM28372  | GSM28366  | GSM28385  | GSM28360  | GSM28369  |
| GSM28489  | GSM28480  | GSM28478  | GSM28479  | GSM28488  |
| GSM28490  | GSM28481  | GSM28483  | GSM28497  | GSM28491  |
| GSM28484  | GSM28486  | GSM28476  | GSM28475  | GSM28495  |
| GSM29753  | GSM29754  | GSM29702  | GSM29704  | GSM29752  |
| GSM30283  | GSM30298  | GSM30318  | GSM30315  | GSM30296  |
| GSM33114  | GSM33106  | GSM33104  | GSM33121  | GSM33122  |
| GSM34941  | GSM34040  | GSM34039  | GSM34915  | GSM34922  |
| GSM34729  | GSM34727  | GSM34708  | GSM34709  | GSM34719  |
| GSM34739  | GSM34747  | GSM34740  | GSM34745  | GSM34746  |
| GSM36437  | GSM36451  | GSM36440  | GSM36432  | GSM36431  |
| GSM37145  | GSM37152  | GSM37153  | GSM37148  | GSM37150  |
| GSM37494  | GSM37493  | GSM37490  | GSM37491  | GSM37489  |
| GSM38206  | GSM38177  | GSM38179  | GSM38165  | GSM38156  |
| GSM38768  | GSM38767  | GSM38769  | GSM38766  | GSM38765  |
| GSM38685  | GSM38689  | GSM38679  | GSM38692  | GSM38694  |
| GSM38988  | GSM38990  | GSM38987  | GSM38989  | GSM38986  |
| GSM39812  | GSM39804  | GSM39803  | GSM39810  | GSM39808  |
| GSM40792  | GSM40789  | GSM40786  | GSM40784  | GSM40785  |
| GSM41008  | GSM40992  | GSM40985  | GSM40982  | GSM41009  |
| GSM42814  | GSM42801  | GSM42749  | GSM42791  | GSM42816  |
| GSM9760   | GSM9851   | GSM9757   | GSM9744   | GSM9723   |
| GSM44657  | GSM44630  | GSM44620  | GSM44653  | GSM44619  |
| GSM45852  | GSM45861  | GSM45849  | GSM45864  | GSM45857  |
| GSM46371  | GSM46393  | GSM46392  | GSM46383  | GSM46384  |
| GSM46387  | GSM46395  | GSM46388  | GSM46390  | GSM46386  |
| GSM46539  | GSM46543  | GSM46541  | GSM46544  | GSM46542  |
| GSM47205  | GSM47215  | GSM47213  | GSM47214  | GSM47210  |
| GSM48034  | GSM48032  | GSM48029  | GSM48031  | GSM48033  |

Continued on next page

|           |           |           |           |           |
|-----------|-----------|-----------|-----------|-----------|
| GSM50066  | GSM50080  | GSM50099  | GSM50097  | GSM50048  |
| GSM51375  | GSM51378  | GSM51372  | GSM51380  | GSM51376  |
| GSM51387  | GSM51390  | GSM51384  | GSM51386  | GSM51385  |
| GSM51402  | GSM51404  | GSM51403  | GSM51405  | GSM51407  |
| GSM51396  | GSM51398  | GSM51399  | GSM51394  | GSM51395  |
| GSM52013  | GSM52018  | GSM52012  | GSM52016  | GSM52015  |
| GSM52668  | GSM52666  | GSM52669  | GSM52662  | GSM52661  |
| GSM52674  | GSM52680  | GSM52677  | GSM52673  | GSM52675  |
| GSM92814  | GSM92818  | GSM92816  | GSM92820  | GSM92819  |
| GSM60137  | GSM60138  | GSM60136  | GSM60130  | GSM60144  |
| GSM60918  | GSM60917  | GSM60920  | GSM60922  | GSM60916  |
| GSM183402 | GSM183411 | GSM183415 | GSM183396 | GSM183413 |
| GSM71058  | GSM71038  | GSM71050  | GSM71047  | GSM71023  |
| GSM47459  | GSM47473  | GSM47468  | GSM47471  | GSM47469  |
| GSM72495  | GSM72499  | GSM72496  | GSM72497  | GSM72498  |
| GSM73022  | GSM73021  | GSM73023  | GSM73020  | GSM73024  |
| GSM73486  | GSM73456  | GSM73443  | GSM73439  | GSM73474  |
| GSM74405  | GSM74367  | GSM74239  | GSM121364 | GSM74376  |
| GSM75880  | GSM75883  | GSM75877  | GSM75879  | GSM75881  |
| GSM76874  | GSM76882  | GSM76884  | GSM76888  | GSM76876  |
| GSM77091  | GSM77097  | GSM77095  | GSM77093  | GSM77102  |
| GSM77096  | GSM77094  | GSM77092  | GSM77103  | GSM77098  |
| GSM79165  | GSM79190  | GSM79216  | GSM79352  | GSM79215  |
| GSM82391  | GSM82392  | GSM82390  | GSM82387  | GSM82381  |
| GSM86086  | GSM86082  | GSM86085  | GSM86084  | GSM86081  |
| GSM86537  | GSM86533  | GSM86541  | GSM86531  | GSM86535  |
| GSM86579  | GSM86567  | GSM86565  | GSM86575  | GSM86569  |
| GSM87881  | GSM87906  | GSM87946  | GSM87911  | GSM87863  |
| GSM88293  | GSM88289  | GSM88295  | GSM88290  | GSM88292  |
| GSM89501  | GSM89528  | GSM89523  | GSM89553  | GSM89524  |
| GSM89516  | GSM89506  | GSM89612  | GSM89564  | GSM89593  |
| GSM92240  | GSM92259  | GSM92250  | GSM92268  | GSM92247  |
| GSM94327  | GSM94308  | GSM94314  | GSM94324  | GSM94315  |
| GSM96950  | GSM96979  | GSM96995  | GSM96953  | GSM97045  |
| GSM99534  | GSM99498  | GSM99514  | GSM99518  | GSM99556  |
| GSM99576  | GSM99574  | GSM99578  | GSM99580  | GSM99582  |
| GSM99444  | GSM99594  | GSM99432  | GSM99596  | GSM99600  |
| GSM99480  | GSM99472  | GSM99468  | GSM99474  | GSM99476  |
| GSM100495 | GSM100566 | GSM100669 | GSM100630 | GSM100629 |
| GSM64856  | GSM64859  | GSM64854  | GSM64862  | GSM64865  |
| GSM104493 | GSM104483 | GSM104481 | GSM104474 | GSM104484 |
| GSM106195 | GSM106225 | GSM106193 | GSM106213 | GSM106207 |
| GSM47719  | GSM47695  | GSM3967   | GSM47682  | GSM47725  |
| GSM3985   | GSM3982   | GSM3983   | GSM3996   | GSM3998   |

Continued on next page

|           |           |           |           |           |
|-----------|-----------|-----------|-----------|-----------|
| GSM29345  | GSM29324  | GSM4005   | GSM4004   | GSM48597  |
| GSM108541 | GSM108545 | GSM108543 | GSM108542 | GSM108540 |
| GSM171890 | GSM171846 | GSM108827 | GSM171842 | GSM171902 |
| GSM109810 | GSM109812 | GSM109811 | GSM109809 | GSM109808 |
| GSM109801 | GSM109804 | GSM109803 | GSM109802 | GSM109806 |
| GSM109220 | GSM109221 | GSM109226 | GSM109223 | GSM109222 |
| GSM119947 | GSM119944 | GSM119950 | GSM119951 | GSM119968 |
| GSM112918 | GSM112916 | GSM112921 | GSM112920 | GSM112919 |
| GSM113934 | GSM113928 | GSM113926 | GSM113935 | GSM113932 |
| GSM114850 | GSM114845 | GSM114848 | GSM114844 | GSM114851 |
| GSM118830 | GSM118984 | GSM118831 | GSM118981 | GSM118860 |
| GSM118835 | GSM118762 | GSM118759 | GSM118786 | GSM119002 |
| GSM118998 | GSM119046 | GSM118918 | GSM118945 | GSM119060 |
| GSM118973 | GSM118959 | GSM118974 | GSM118970 | GSM118958 |
| GSM118878 | GSM118977 | GSM118843 | GSM118866 | GSM118978 |
| GSM119493 | GSM119733 | GSM119713 | GSM119711 | GSM119721 |
| GSM118580 | GSM118661 | GSM118624 | GSM118659 | GSM118660 |
| GSM129732 | GSM129744 | GSM129741 | GSM129738 | GSM129768 |
| GSM129769 | GSM129742 | GSM129760 | GSM129757 | GSM129745 |
| GSM129737 | GSM129755 | GSM129740 | GSM129767 | GSM129764 |
| GSM132636 | GSM132639 | GSM132626 | GSM132623 | GSM132632 |
| GSM135264 | GSM135270 | GSM135271 | GSM135265 | GSM135273 |
| GSM139471 | GSM139455 | GSM139434 | GSM139463 | GSM139474 |
| GSM139516 | GSM139537 | GSM139504 | GSM139529 | GSM139534 |
| GSM139681 | GSM139672 | GSM139679 | GSM139673 | GSM139675 |
| GSM140896 | GSM140893 | GSM140899 | GSM140895 | GSM140898 |
| GSM142967 | GSM142968 | GSM142964 | GSM142966 | GSM142965 |
| GSM142958 | GSM142950 | GSM142970 | GSM142951 | GSM142959 |
| GSM143575 | GSM143578 | GSM143583 | GSM143574 | GSM143580 |
| GSM143586 | GSM143588 | GSM143593 | GSM143599 | GSM143591 |
| GSM144025 | GSM144030 | GSM144034 | GSM144032 | GSM144021 |
| GSM144203 | GSM144205 | GSM144202 | GSM144204 | GSM144206 |
| GSM173201 | GSM173245 | GSM173257 | GSM173250 | GSM173178 |
| GSM146797 | GSM146782 | GSM146793 | GSM146789 | GSM146788 |
| GSM9805   | GSM9815   | GSM9692   | GSM9750   | GSM9798   |
| GSM147634 | GSM147607 | GSM147650 | GSM147608 | GSM147594 |
| GSM149054 | GSM148915 | GSM148956 | GSM148912 | GSM148980 |
| GSM152343 | GSM152355 | GSM152351 | GSM152346 | GSM152349 |
| GSM153424 | GSM153477 | GSM153474 | GSM153490 | GSM153461 |
| GSM154426 | GSM154424 | GSM154427 | GSM154430 | GSM154429 |
| GSM154225 | GSM154221 | GSM154220 | GSM154208 | GSM154411 |
| GSM154436 | GSM154437 | GSM154439 | GSM154438 | GSM154434 |
| GSM154774 | GSM154791 | GSM154785 | GSM154787 | GSM154782 |
| GSM155204 | GSM155233 | GSM155200 | GSM155220 | GSM155182 |

Continued on next page

|           |           |           |           |           |
|-----------|-----------|-----------|-----------|-----------|
| GSM155223 | GSM155187 | GSM155195 | GSM155221 | GSM155234 |
| GSM157150 | GSM157160 | GSM157158 | GSM157154 | GSM157156 |
| GSM158635 | GSM158638 | GSM158640 | GSM158637 | GSM158641 |
| GSM159362 | GSM159361 | GSM159355 | GSM159372 | GSM159364 |
| GSM159483 | GSM159488 | GSM159486 | GSM159487 | GSM159480 |
| GSM159935 | GSM159939 | GSM159937 | GSM159944 | GSM159933 |
| GSM161600 | GSM161625 | GSM161613 | GSM161617 | GSM161636 |
| GSM161678 | GSM161674 | GSM161686 | GSM161679 | GSM161670 |
| GSM161947 | GSM161917 | GSM161925 | GSM161931 | GSM161929 |
| GSM162896 | GSM162894 | GSM162895 | GSM162890 | GSM162892 |
| GSM171259 | GSM171391 | GSM171237 | GSM171416 | GSM171299 |
| GSM172129 | GSM172140 | GSM172133 | GSM172136 | GSM172123 |
| GSM177141 | GSM177137 | GSM177142 | GSM177134 | GSM177139 |
| GSM177580 | GSM177579 | GSM177581 | GSM177577 | GSM177582 |
| GSM181430 | GSM181429 | GSM181426 | GSM181425 | GSM181428 |
| GSM181326 | GSM181332 | GSM181322 | GSM181320 | GSM181327 |
| GSM182283 | GSM182289 | GSM182291 | GSM182299 | GSM182290 |
| GSM182292 | GSM182285 | GSM182293 | GSM182295 | GSM182294 |
| GSM182301 | GSM182309 | GSM182307 | GSM182306 | GSM182300 |
| GSM188014 | GSM188013 | GSM188018 | GSM188020 | GSM188022 |
| GSM189712 | GSM189710 | GSM189709 | GSM189711 | GSM189708 |
| GSM11823  | GSM12300  | GSM12283  | GSM12098  | GSM12067  |
| GSM155025 | GSM155026 | GSM155027 | GSM155023 | GSM155028 |
| GSM200680 | GSM200678 | GSM200682 | GSM200681 | GSM200683 |
| GSM200756 | GSM200755 | GSM200754 | GSM200749 | GSM200748 |
| GSM200742 | GSM200741 | GSM200739 | GSM200612 | GSM200740 |
| GSM203303 | GSM203335 | GSM203280 | GSM203384 | GSM203286 |
| GSM203598 | GSM203596 | GSM203597 | GSM203599 | GSM203595 |
| GSM209830 | GSM209812 | GSM209824 | GSM209822 | GSM209825 |
| GSM210420 | GSM210422 | GSM210423 | GSM210418 | GSM210421 |
| GSM210402 | GSM210388 | GSM210393 | GSM210407 | GSM210396 |
| GSM210408 | GSM210398 | GSM210406 | GSM210405 | GSM210404 |
| GSM211183 | GSM211182 | GSM211185 | GSM211186 | GSM211184 |
| GSM212609 | GSM212608 | GSM212607 | GSM212606 | GSM212605 |
| GSM213818 | GSM213820 | GSM213821 | GSM213817 | GSM213819 |
| GSM215423 | GSM215426 | GSM215425 | GSM215427 | GSM215422 |
| GSM216547 | GSM216544 | GSM216545 | GSM216548 | GSM216546 |
| GSM217630 | GSM217626 | GSM217629 | GSM217620 | GSM217627 |
| GSM219461 | GSM219489 | GSM219477 | GSM219471 | GSM219468 |
| GSM219520 | GSM219508 | GSM219490 | GSM219496 | GSM219506 |
| GSM15389  | GSM15390  | GSM15391  | GSM15392  | GSM15393  |
| GSM14973  | GSM14965  | GSM14967  | GSM14962  | GSM14969  |
| GSM15730  | GSM15726  | GSM15733  | GSM15729  | GSM15738  |

Table 2: This table displays the dates on which samples in GSE1456 were hybridized to a microarray, the batch to which each date was assigned, and the number of samples hybridized on that date.

| Date       | Batch | Number of Samples |
|------------|-------|-------------------|
| 2002-06-18 | 1     | 12                |
| 2002-06-19 | 1     | 7                 |
| 2002-06-25 | 2     | 12                |
| 2002-06-26 | 2     | 10                |
| 2002-06-27 | 2     | 9                 |
| 2002-06-28 | 2     | 9                 |
| 2002-07-12 | 3     | 19                |
| 2002-07-23 | 4     | 11                |
| 2002-07-24 | 4     | 4                 |
| 2002-07-26 | 4     | 3                 |
| 2002-07-29 | 5     | 28                |
| 2002-07-30 | 5     | 6                 |
| 2002-07-31 | 5     | 3                 |
| 2003-03-06 | 6     | 24                |
| 2003-03-08 | 6     | 2                 |
